# Supplementary material
Source: Springer Nature journal article supplement (https://www.springermedizin.de/resource/supplementary/12990_2008_193_MOESM5_ESM.pdf/9612762)

A

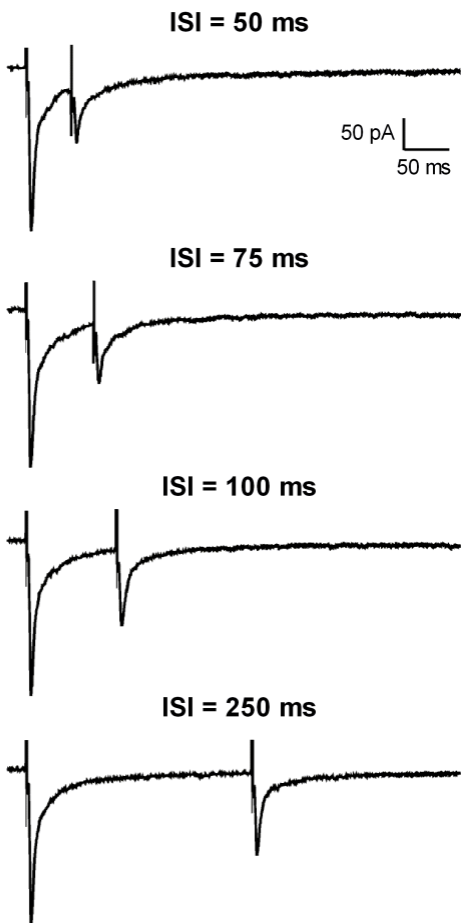

B

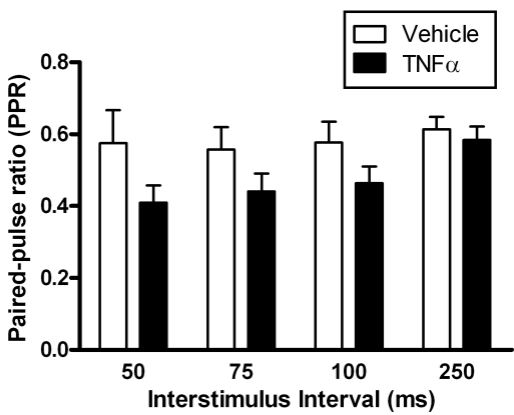

Supplement: MOESM5 [file 9612762]
